# Supplementary material
Source: ML conference proceedings conference paper supplement (https://proceedings.mlr.press/v80/gao18b.html)
Supplement: Supplementary file [file gao18b-supp.pdf]

## 6. Supplementary Materials for “Parallel Bayesian Network Structure Learning”

We have tested our algorithm on 2 more datasets, CHILD3 (CH) and HAILFINDER (HA). For synchronous cases, BDeu scores fluctuate within  $-0.2$  to  $+0.2\%$  and  $-0.1\%$  to  $+2\%$  for CH and HA respectively. Efficiency-wise, we observe that using the proposed inference rules reduces total function calls from 3722 (CH) and 3158 (HA) for GGSL to 1039 and 948 with the inference rules, which is about a 3~4X improvement. When the number of learning agents  $K > 1$ , we observe similar trends of mean function call reduction as in ALARM. We observe similar results in asynchronous cases as well.

Table 3. BDeu Scores and Numbers of Queries for Different Parallel Algorithms on CHILD10 dataset.

| SYNCHRONOUS  |             |        |         |
|--------------|-------------|--------|---------|
| $k$ AGENT    | BDEU CHANGE | MEANFC | TOTALFC |
| GGSL         | +0.0        | 3722   | 3722    |
| 1            | +0.0        | 1039   | 1039    |
| 2            | -1039.1     | 600.5  | 1201    |
| 3            | -234.3      | 350.7  | 1052    |
| 4            | +480.0      | 263    | 1052    |
| 5            | +962.9      | 230    | 1150    |
| ASYNCHRONOUS |             |        |         |
| $k$ AGENT    | BDEU CHANGE | MEANFC | TOTALFC |
| 2            | -60.0       | 514.0  | 1028    |
| 3            | -239.8      | 373.3  | 1120    |
| 4            | -28.0       | 245.3  | 969     |
| 5            | +741.5      | 206.8  | 1034    |

Table 4. BDeu Scores and Numbers of Queries for Different Parallel Algorithms on HAILFINDER dataset.

| SYNCHRONOUS  |             |        |         |
|--------------|-------------|--------|---------|
| $k$ AGENT    | BDEU CHANGE | MEANFC | TOTALFC |
| GGSL         | +0.0        | 3158   | 3158    |
| 1            | +0.0        | 948    | 948     |
| 2            | +314.5      | 443.5  | 887     |
| 3            | +767.3      | 345.7  | 1037    |
| 4            | +209.1      | 273.3  | 1093    |
| 5            | +432.8      | 235.2  | 1176    |
| ASYNCHRONOUS |             |        |         |
| $k$ AGENT    | BDEU CHANGE | MEANFC | TOTALFC |
| 2            | -60.0       | 482.0  | 964     |
| 3            | +767.6      | 332.3  | 997     |
| 4            | +856.5      | 277.0  | 1108    |
| 5            | +593.4      | 199.8  | 999     |
